# Supplementary material for: Visualization of direct and diffusion-assisted RAD51 nucleation by full-length human BRCA2 protein
Source: PubMed Central journal article supplement (PMC7615647; doi:10.1016/j.molcel.2023.06.031), 2023-07-26
Supplement: EMS193943-supplement-Supplemental_information.pdf [file EMS193943-supplement-Supplemental_information.pdf]

**Molecular Cell, Volume 83**

**Supplemental information**

**Visualization of direct and diffusion-assisted**

**RAD51 nucleation by full-length**

**human BRCA2 protein**

**Ondrej Belan, Luke Greenhough, Lucas Kuhlen, Roopesh Anand, Artur Kaczmarczyk, Dominika T. Gruszka, Hasan Yardimci, Xiaodong Zhang, David S. Rueda, Stephen C. West, and Simon J. Boulton**

## Supplementary Figures

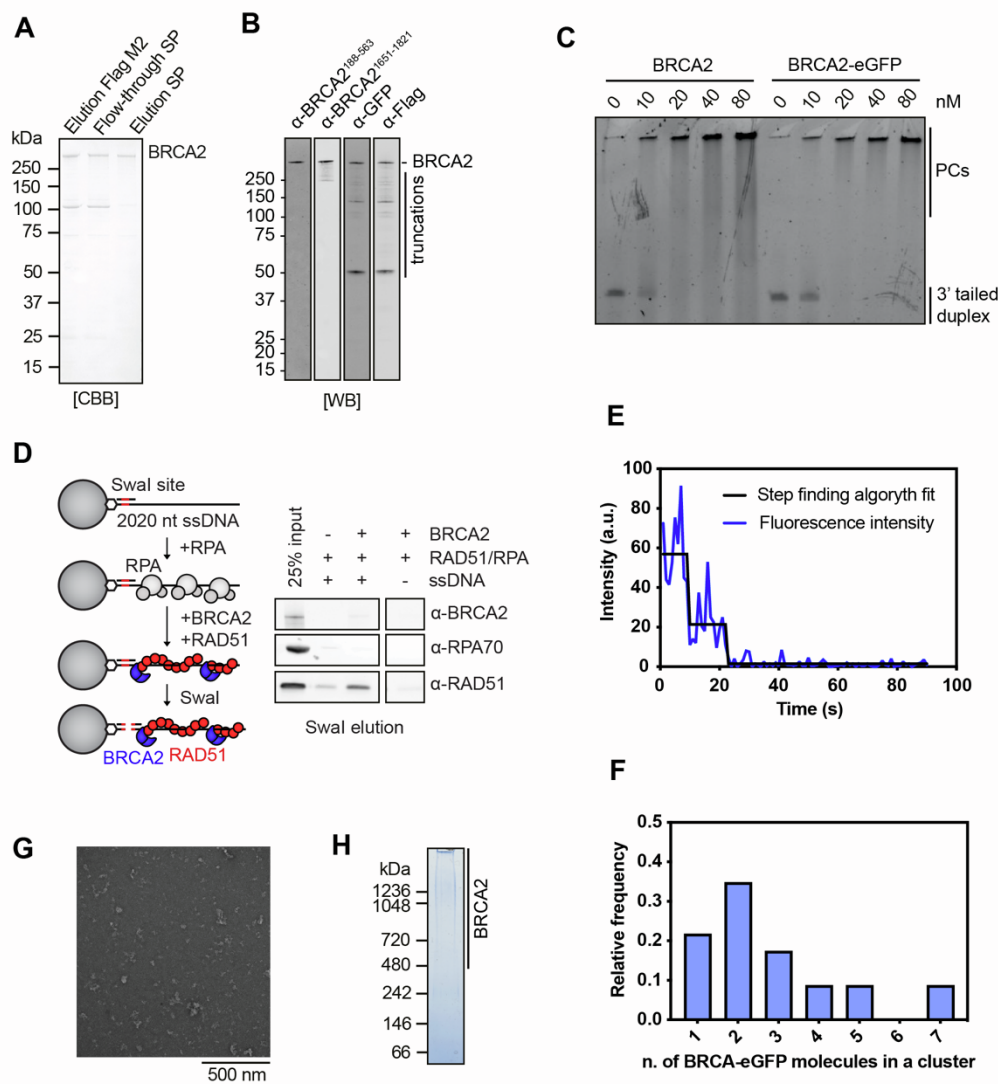

**Figure S1: BRCA2 characterization. Related to Fig. 1.** (A) Purification of full-length human BRCA2. (B) Western blot of purified BRCA2-eGFP performed using antibodies targeting indicated epitopes (N-terminal and central region of BRCA2; eGFP; FLAG). (C) Electrophoretic mobility shift assay (EMSA) performed with 167mer 3' tailed DNA and BRCA2 or BRCA2-eGFP. PCs - protein-DNA complexes. (D) DNA capture assay. Biotinylated RPA-coated 2020 nt-long ssDNA immobilized on streptavidin-coated beads was incubated with RAD51 and BRCA2, washed and proteins were eluted via Swal cleavage of the DNA. Samples were analysed by SDS-PAGE. Quantitative analysis was performed following western-blotting and fluorescent detection using Licor system. (E) Examples of a fluorescence intensity trace of the BRCA2-eGFP cluster during continuous photobleaching. Black line represents stepping fit of the trace. (F) Histogram of BRCA2 cluster size in the presence of RAD51 (N = 23 molecules). (G) Electron micrograph of recombinant BRCA2 negatively stained with uranyl acetate. The sample is polydisperse owing to the range of oligomeric states observed. (H) 3-12% Native PAGE of recombinant BRCA2, stained with Coomassie.

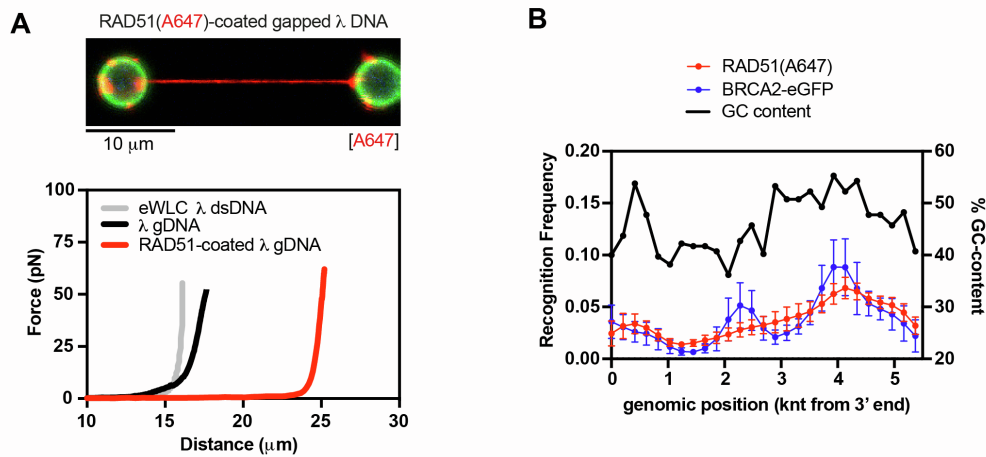

**Figure S2: RAD51-gDNA characterization and further nucleation position-sequence analysis. Related to Fig. 2 and Fig. 3. (A)** Top: representative image of RAD51(A647)-coated  $\lambda$  gDNA held at  $\sim 5$  pN force. Bottom: force extension curves of  $\lambda$  gDNA (with 5.374 knt-long ssDNA gap, black), force extension curves of  $\lambda$  gDNA coated with RAD51(A647) (red). Gray line represents extensible worm-like chain model (eWLC) for 48.5 kb  $\lambda$  dsDNA as a reference. **(B)** Position analysis of RAD51(A647) (red) or BRCA2-eGFP (blue) binding along the length of 5.374 knt ssDNA gap in the absence of RPA.  $N = 6$  molecules. Error bars represent S.E.M. 200 nt bins. GC-content of the DNA sequence within each bin is indicated in black.

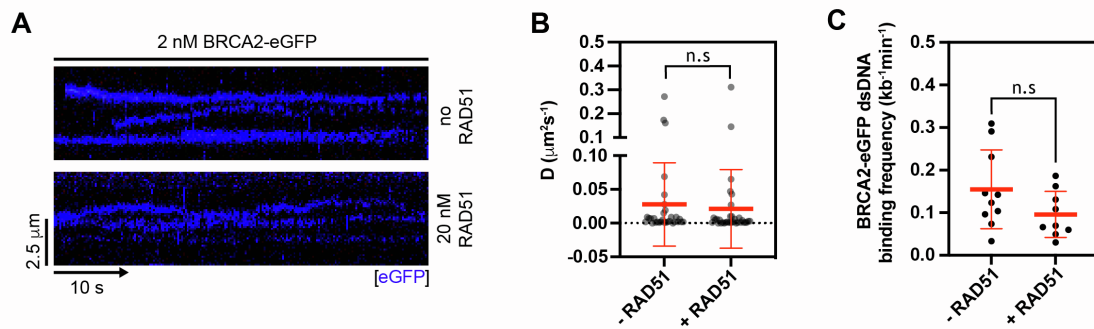

**Figure S3: BRCA2 diffusion on dsDNA in the absence of RAD51. Related to Fig. 4. (A)** Representative kymographs demonstrating diffusion of BRCA2-eGFP (blue) along  $\lambda$  dsDNA at 10 pN in the presence of 50 mM NaCl, 2 mM  $\text{MgCl}_2$  and 2 mM ATP in the presence or absence of 20 nM RAD51 (unlabelled). **(B)** Diffusion coefficient ( $D$ ) calculated from MSD analysis for BRCA2-eGFP complexes moving on dsDNA in the presence or absence of RAD51. Lines represent mean. Error bars represent S.D. P values by Mann-Whitney test. (n.s.)  $P > 0.05$ ; (\*)  $P \leq 0.05$ ; (\*\*)  $P \leq 0.01$ ; (\*\*\*)  $P \leq 0.001$ ; (\*\*\*\*)  $P \leq 0.0001$ . **(C)** dsDNA binding frequency of BRCA2-eGFP in the presence or absence of 20 nM RAD51, 50 mM NaCl, 2 mM  $\text{MgCl}_2$ , 2 mM ATP on dsDNA held at 10 pN force. Lines represent mean. Error bars represent S.D. P values by student t test.

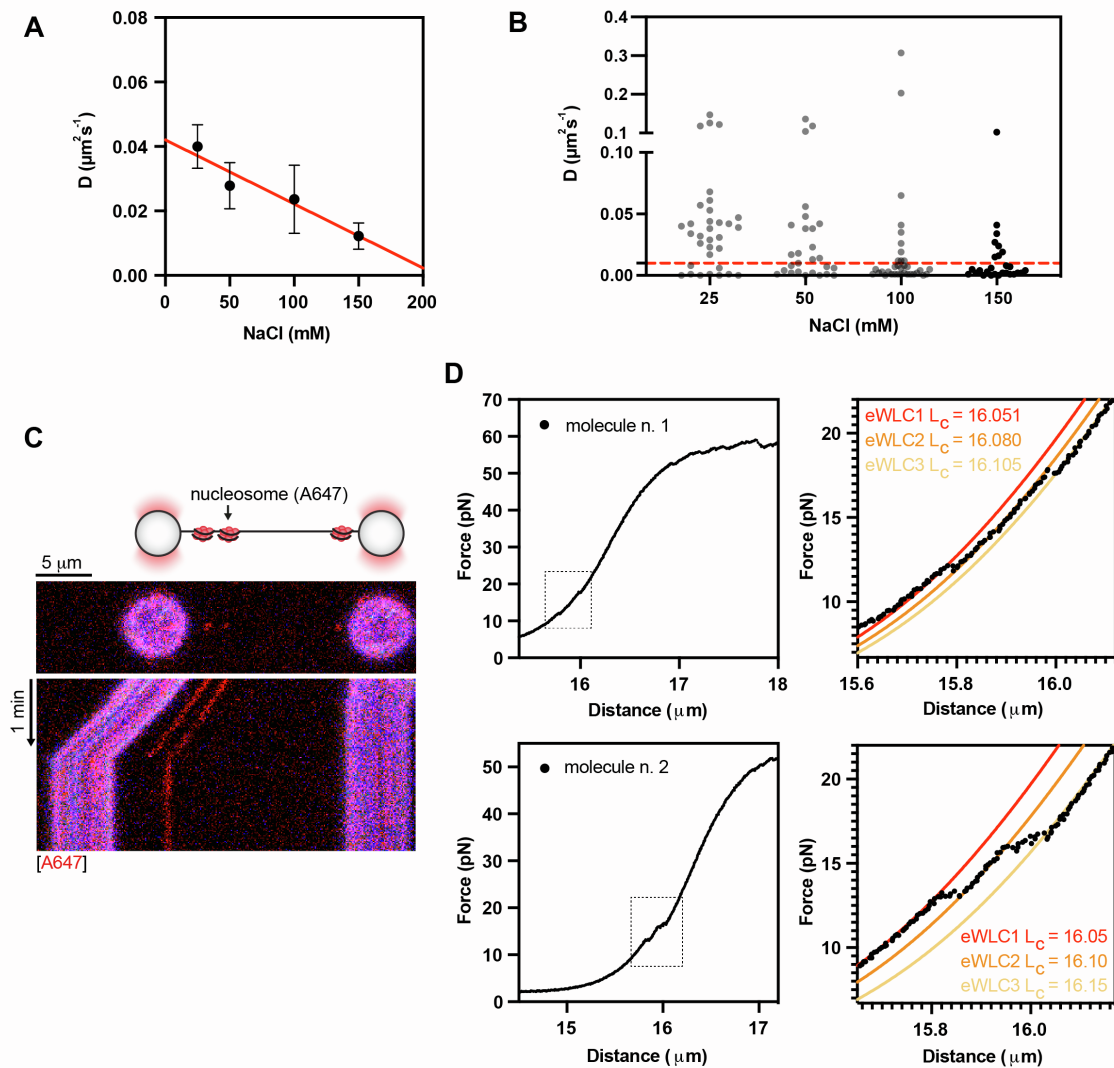

**Figure S4: Characterization of chromatinized  $\lambda$  DNA. Related to Fig. 5. (A)** Diffusion coefficient ( $N = 27\text{-}34$ ) calculated for BRCA2-RAD51 complexes as a function of salt concentration. Error bars represent S.E.M. **(B)** Diffusion coefficient distribution calculated for BRCA2-RAD51 complexes at different salt concentrations. Red dashed line represents static fraction cut-off. **(C)** Representative kymograph showing stretching of sparsely chromatinized  $\lambda$  DNA. Alexa Fluor 647-labelled nucleosomes are shown in red. **(D)** Two examples of force-distance curve of sparsely chromatinized  $\lambda$  DNA. Individual unwrapping events characterized by sudden distance increase under the same force are highlighted in a dashed line box. Lines correspond to extensible worm-like chain (eWLC) models of dsDNA aligned with the corresponding force-extension curve segments.  $L_c$  corresponds to calculated contour length of DNA from the fit.  $L_c$  difference between adjacent eWLCs corresponds to length of DNA released during a nucleosome unwrapping event.

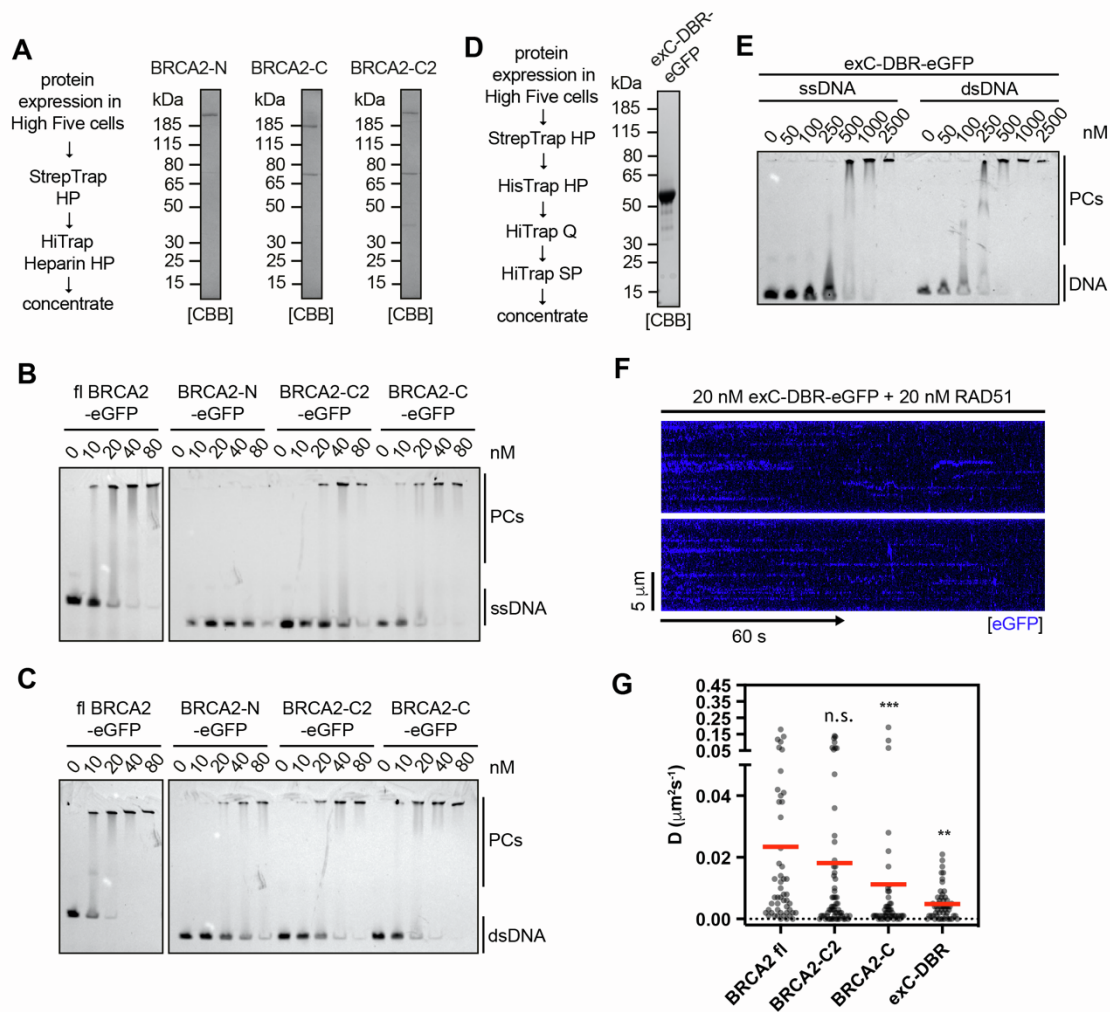

**Figure S5: Further characterization of BRCA2 mutants. Related to Fig. 6. (A)** Purification of BRCA2-N, BRCA2-C and BRCA2-C2 truncation mutants. Proteins were resolved by SDS-PAGE and stained by Coomassie Brilliant Blue staining (CBB). **(B)** Electrophoretic mobility shift assay (EMSA) to assess affinity of BRCA2 and BRCA2 truncation mutants to 100mer ssDNA. **(C)** Electrophoretic mobility shift assay (EMSA) to assess affinity of BRCA2 and BRCA2 truncation mutants to 100mer dsDNA. PCs - protein-DNA complexes. **(D)** Purification of exC-DBR-eGFP fusion. Protein resolved by SDS-PAGE and stained by Coomassie Brilliant Blue staining (CBB). **(E)** Electrophoretic mobility shift assay (EMSA) to assess affinity of exC-DBR-eGFP to 100mer ss- and dsDNA. PCs - protein-DNA complexes. **(F)** Two representative kymographs demonstrating limited diffusion of exC-DBR-eGFP (blue) along  $\lambda$  dsDNA at 10 pN in the presence of 50 mM NaCl, 2 mM MgCl<sub>2</sub>, 2 mM ATP and 20 nM RAD51 (unlabelled). **(G)** Diffusion coefficient (D) calculated from MSD analysis for exC-DBR-eGFP molecules moving on dsDNA in the presence of RAD51. Lines represent mean. Data for BRCA2 fl, BRCA2-C and BRCA2-C2 are of the same dataset as in Fig. 6H. P values by Mann-Whitney test. (n.s.) P > 0.05; (\*) P  $\leq$  0.05; (\*\*) P  $\leq$  0.01; (\*\*\*) P  $\leq$  0.001; (\*\*\*\*) P  $\leq$  0.0001.

| Oligonucleotides                                                                                                                                                                                                        |                                  |            |
|-------------------------------------------------------------------------------------------------------------------------------------------------------------------------------------------------------------------------|----------------------------------|------------|
| Oligonucleotide name and sequence                                                                                                                                                                                       | Source                           | Identifier |
| 100mer ssDNA<br>5'-Cy5-<br>CCAAGAAGCTGTTCAAGAATCAGAATGAGCCGCAACT<br>CGGGATGAAAATGCTCACAATGACAAA-<br>TCTGTCCACGGAGTGCTTAATCCAACCTACCAAGCT-3'                                                                             | IDT, this study                  | N/A        |
| 100mer dsDNA bottom<br>5'-<br>AGCTTGTAAGTTGGATTAAGCACTCCGTGGACAGAT<br>TTGTCATTGTGAGCATTTCATCCCGAAGTTGCGGCTC<br>ATTCTGATTCTGAACAGCTTCTTGG-3'                                                                             | IDT, this study                  | N/A        |
| 3'tailed DNA top<br>5'-Cy5-<br>CTGCTTTATCAAGATAATTTTTCGACTCATCAGAAATA<br>TCCGTTTCCTATATTTATTCCTATTA-<br>TGTTTTATTCACTTACTTATTCTTTATGTTCATTTTTAT<br>ATCCTTACTTTATTTCTCTGTTTATTCATTTACTTATT<br>TTGTATTATCCTTATCTTATTTA-3' | IDT, this study                  | N/A        |
| 3'tailed DNA bottom<br>5'-CGGATATTTCTGATGAGTCGAAAAATTATCTTGA-<br>TAAAGCAG-3'                                                                                                                                            | IDT, this study                  | N/A        |
| biot-Swal-2023bp-f<br>5'-biotin-<br>AACAAAATATTAACGCTTACAATTTAAATGGTGGCAC<br>TTTTCG-3'                                                                                                                                  | IDT, this study                  | N/A        |
| 2023bp-r<br>5'-TCAACGTGCAATCAAGTTAATGAATCGG-3'                                                                                                                                                                          | IDT, this study                  | N/A        |
| biot-Swal-rc<br>5'-<br>CGAAAAGTGCCACCATTTAAATTGTAAGCGTTAATAT<br>TTTGTT-3'                                                                                                                                               | IDT, this study                  | N/A        |
| λ DNA end-cap 1<br>5'-<br>AGGTCGCCGCCCGGAGTTGAACG(BT)(BT)T(BT)T(BT)<br>ACGTTCAACTCC-3'                                                                                                                                  | IDT, Belan et al, 2021           | N/A        |
| λ DNA end-cap 2<br>5'-GGGCGGCGCA<br>CCTCAAGTTGGACAA(BT)T(BT)T(BT)(BT)TGTCCTCAACT<br>TG-3'                                                                                                                               | IDT, Belan et al, 2021           | N/A        |
| λ DNA handles oligo 1<br>5'-GGGCGGCGACCTGGACAA-3'                                                                                                                                                                       | Sigma Aldrich, Belan et al, 2021 | N/A        |
| λ DNA handles oligo 2<br>5'-AGGTCGCCGCCCTTTTTTTT(BT)TT(BT)TT(BT)-3'                                                                                                                                                     | Sigma Aldrich, Belan et al, 2021 | N/A        |

|                                                                                                                           |                                              |            |
|---------------------------------------------------------------------------------------------------------------------------|----------------------------------------------|------------|
| <p>λ DNA handles oligo 3<br/> 5'-<br/> T(BT)TT(BT)TT(BT)TTTTTTAGAGTACTGTACGATCTA<br/> GCATCAATCTTGTCC-3')</p>             | <p>Sigma Aldrich, Belan<br/> et al, 2021</p> | <p>N/A</p> |
| <p>crRNA λ4<br/> 5'-CAGAUAUAGCCUGGUGGUUCGUUUUAGAGC<br/> UAUGCUGUUUUG-3'</p>                                               | <p>IDT, Belan et al, 2021</p>                | <p>N/A</p> |
| <p>crRNA λ5<br/> 5'-<br/> GGCAAUGCCGAUGGCGAUAGGUUUUAGAGCUAUG<br/> CUGUUUUG-3'</p>                                         | <p>IDT, Belan et al, 2021</p>                | <p>N/A</p> |
| <p>tracr RNA (trRNA)<br/> 5'-GGACAGCAUAGCAAGU<br/> UAAAAUAAGGCUAGUCCGUUAUCAACUUGAAA<br/> AAGUGGCACCGAGUCGGUGCUUUUU-3'</p> | <p>IDT, Belan et al, 2021</p>                | <p>N/A</p> |

**Table S1: Oligonucleotides used in the study.** Related to KEY RESOURCE TABLE.
